# Supplementary material for: The evolution of autotomy in leaf‐footed bugs
Source: PubMed Central journal article supplement (PMC7317576; doi:10.1111/evo.13948), 2020-04-08
Supplement: EVO-74-897-s001.pdf [file EVO-74-897-s001.pdf]

## Supplementary file for:

### The evolution of autotomy in leaf-footed bugs

**Authors:** Zachary Emberts<sup>1\*</sup>, Colette M St. Mary<sup>1</sup>, Cody Coyotee Howard<sup>1,2</sup>, Michael Forthman<sup>3</sup>, Philip W Bateman<sup>4</sup>, Ummat Somjee<sup>5</sup>, Wei Song Hwang<sup>6</sup>, Daiqin Li<sup>7</sup>, Rebecca T Kimball<sup>1</sup>, Christine W Miller<sup>3</sup>

#### **Affiliations:**

<sup>1</sup> Department of Biology, University of Florida, 876 Newell Drive Gainesville, Florida 32611, USA

<sup>2</sup> Florida Museum of Natural History, University of Florida, Gainesville, Florida 32611, USA

<sup>3</sup> Entomology & Nematology Department, University of Florida, 1881 Natural Area Drive Gainesville, Florida 32611, USA

<sup>4</sup> Behavioural Ecology Lab, School of Molecular and Life Sciences, Curtin University, Bentley, Perth WA 6845, Australia

<sup>5</sup> Smithsonian Tropical Research Institute, Balboa, Ancón, Panamá

<sup>6</sup> Lee Kong Chian Natural History Museum, National University of Singapore, 2 Conservatory Drive, Singapore 117377, Singapore

<sup>7</sup> Department of Biological Science, National University of Singapore, 14 Science Drive 4, Singapore 117543, Singapore

\*Correspondence to: emberts@ufl.edu

## **Appendix S1. Individuals that did not autotomize within one hour were recorded as taking 3600 s to autotomize.**

To investigate the evolution of autotomy in leaf-footed bugs we conducted 1,253 autotomy trials. During these trials, individuals were given 1 hour (3600 s) to escape from entrapment. Although a majority of individuals autotomized their hind limb during this scenario, 498 did not. Lack of autotomy during the given timeframe can be interpreted in one of two ways. First, it is possible that these individuals cannot or will not autotomize their hind legs. Second, it is possible that these individuals would have autotomized their hind legs if they were given more time. Although we cannot rule out the first hypothesis completely, we do have evidence to suggest that many, if not most, of these individuals would have eventually autotomized their hind legs.

Evidence suggests that all the leaf-footed bugs included in this study can autotomize. Of the 62 species investigated, we provide data showing that 56 of them can drop their legs. Of the remaining 6 species, we have personally observed *Spartocera fusca*, *Stenocoris filiformis*, *Acanthocephala thomasi*, *Piezogaster calcarator*, and *Homoeocerus angulatus* autotomizing so we are confident that they can autotomize their legs as well. It is worth noting that we have not observed *Spartocera batatas* autotomizing. However, we have observed wild caught *S. batatas* missing legs at their trochanter-femur joint (i.e., the autotomy fracture plane). Thus, we have no reason to believe that any leaf-footed bug species is incapable of autotomy.

There is also strong evidence to suggest that some leaf-footed bugs will wait for more than an hour before autotomizing an entrapped limb. In a different study (Z.E. unpublished data), we gave individuals 2 hours to escape from entrapment. Only 5 of the 24 *Acanthocephala declivis* investigated in the study autotomized their hind leg within 1 hour, while 9 individuals autotomized their hind leg within 2 hours. That is to say, 4 additional individuals took between 1 and 2 hours to autotomize their hind leg. This data nicely illustrates why it is reasonable for us to assume that more leaf-footed bugs would have autotomized their hind legs if we had given them more time. We do acknowledge that some individuals investigated in this study may have never autotomized their hind legs. It is conceivable, for example, that some individuals may not have had enough energy to perform autotomy (i.e., a physiological constraint). However, such scenarios are likely the exception and not the rule.

Given that autotomy can occur after one hour, we decided to record individuals that did not autotomize during the study as taking 3600 s to autotomize. This approach will underestimate the true mean of the sampled population if we reasonably assume that all of the individuals would have eventually autotomized (i.e., taken longer than 3600 s to autotomize). Consequently, our finding that the ancestor of leaf-footed bugs took 19 minutes to autotomize their hind leg on average is likely an underestimation, which strengthens our conclusion that the ancestor autotomized slowly. The alternative to assigning those that did not drop their leg as taking 3600 s to autotomize would be to exclude these individuals from our analyses. Removal of these data points would require us to assume that all of these individuals cannot or will not autotomize, an unrealistic assumption. This could result in us considerably underestimating a species true latency to autotomize.

Using median latency to autotomize ameliorates most of the concerns about how we should deal with individuals that do not autotomize. Specifically, if at least half of the individuals investigated per species autotomized within 1 hour, our results would accurately reflect the true median of the sampled population. This occurred in 70% of the investigated species (44 out of 62). The robustness of median can be illustrated nicely using our data on the

latency to autotomize in *Mictis profana* (Appendix S1 Figure 1). Imagine a scenario in which we gave individuals 2000 s to escape from entrapment, as compared to 3600 s. Under the 2000 s scenario, we would have observed 38 individuals autotomizing their entrapped leg, and 20 that retained them (which we assign as taking 2000 s to autotomize). The mean and median of the data under this scenario would be 842 and 256 s, respectively. If we compare these results to our 3600 s escape from entrapment scenario (i.e., our actual results) we find that 43 individuals autotomized and 15 did not (which we assign as taking 3600 s to autotomize). The mean and median for this data is 1,321 and 256 s, respectively. Note that the median is 256 s for both scenarios. In addition to addressing concerns about how to deal with individuals that did not autotomize, median is also a better measure of central tendency for species that have a right skewed distribution with a long tail, as is the case for *M. profana* (Appendix S1 Figure 1).

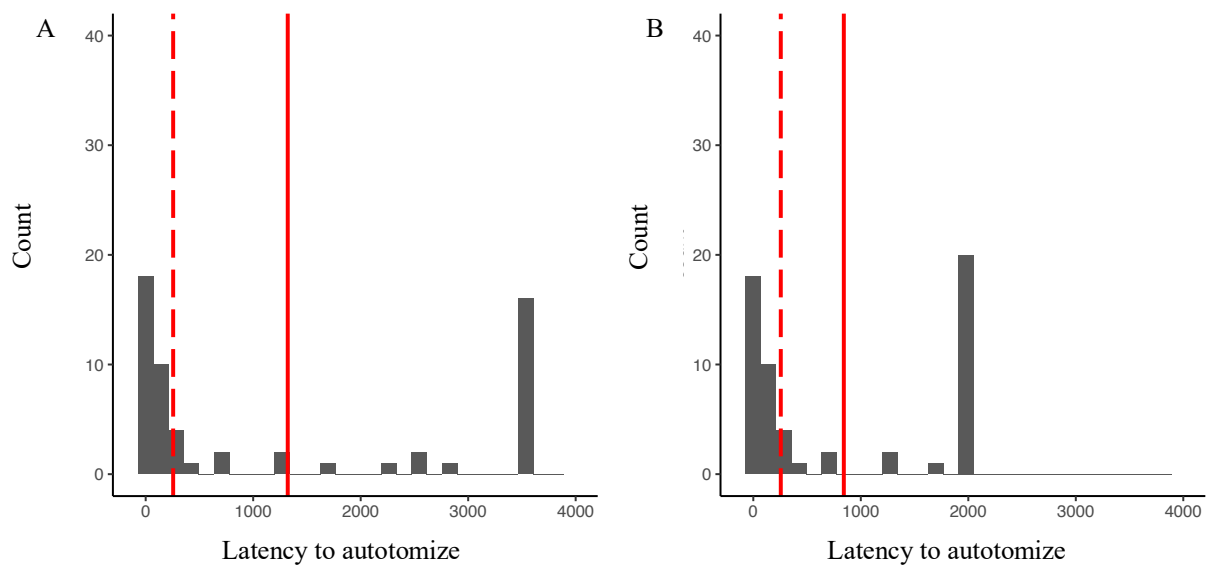

**Appendix S1 Figure 1.** Histogram of the latency to autotomize for *Mictis profana* when using a 3600 s escape from entrapment scenario (A), compared to a 2000 s escape from entrapment scenario (B). Note that the distribution for the latency to autotomize has a right skew, which is common for time-to-event data. Dashed lines represent medians, while solid lines represent means. In this context, our mean result is sensitive to our chosen escape from entrapment scenario while our median result is not because more than 50% of the individuals autotomized.

## **Appendix S2. Our dating analyses revealed younger age estimates than previously reported.**

Our BEAST dating analysis placed the origins of the Coreoidea between 51.46–54.9 mya (median 53.06 mya) and Coreidae + Alydidae between 24.02–49.24 mya (median 33.53 mya). Whereas our treePL dating analysis placed Coreoidea at 48.5 mya (median 48.5 mya) and Coreidae + Alydidae between 32.7785–35.2195 mya (median 33.9972 mya). Both dating analyses identify these clades as originating more recently than previously reported (Wang et al. 2016, Li et al. 2017, Johnson et al. 2018, Liu et al. 2019). Wang et al. (2016) found Coreoidea originated around 153–166 mya (median 160) and Coreidae + Alydidae around 112–154 mya (median 138). Wang et al. (2016) used BEAST to date their tree and included 15 fossil calibrations. Li et al (2017) estimated the origin of Coreoidea to be 157 mya (range 143–168) and Liu et al (2019) estimated the Coreoidea origin to be 162 mya (range 139–179); both studies dated their trees with PhyloBayes. Finally, Johnson and colleagues (2018) estimated Coreoidea to have originated around 93 mya and Coreidae + Alydidae around 72 mya using MCMCTree (Bayesian) molecular dating analysis as implemented in PAML. Differences between our age estimates and those previously reported are most likely a result of using different fossil calibrations. None of the fossil calibrations in these other studies included Coreidae or Alydidae fossils, while our study included three. Moreover, differences in the specific dating analyses and their specified parameters, taxon sampling, and differences in how the molecular data were obtained likely contribute to variation in the age estimates as well.

**Appendix S3. Both male and female leaf-footed bug ancestors autotomized their hind legs slowly.**

Ancestral state reconstruction using only the male data estimated the ancestor of leaf-footed bugs to have a median latency to autotomize of 1,419 s (back transformed from 37.67  $\sqrt{s}$ ) under both an OU and BM model of trait evolution, with a 95% confidence interval that ranged from 178–3,843 s (back transformed from 13.343–61.993  $\sqrt{s}$ ). For the female data, the ancestor of leaf-footed bugs was estimated to have a median latency to autotomize of 894 s (back transformed from 29.893  $\sqrt{s}$ ) assuming an OU model of trait evolution and 899 s (back transformed from 29.979  $\sqrt{s}$ ) when assuming BM. The 95% confidence interval for the female leaf-footed bug ancestor ranged from 9–3,236 s (back transformed from 3.069–56.890  $\sqrt{s}$ ).

Ancestral state reconstruction using only the male data estimated the ancestor of leaf-footed bugs to have a mean latency to autotomize of 1,552 s (back transformed from 39.396  $\sqrt{s}$  assuming an OU model of trait evolution and 39.398  $\sqrt{s}$  assuming a BM model) with a 95% confidence interval that ranged from 289–3,820 s (back transformed from 16.993–61.804  $\sqrt{s}$  assuming a BM model of trait evolution). With only the female data the ancestor of leaf-footed bugs is estimated to have a mean latency to autotomize of 947 s (back transformed from 30.779  $\sqrt{s}$ ) assuming an OU model of trait evolution and 1,024 s (back transformed from 31.995  $\sqrt{s}$ ) when assuming a BM model of trait evolution. The 95% confidence interval for the leaf-footed bug ancestor using the female data ranges from 29–3,437 s (back transformed from 5.361–58.629  $\sqrt{s}$ ) under BM.

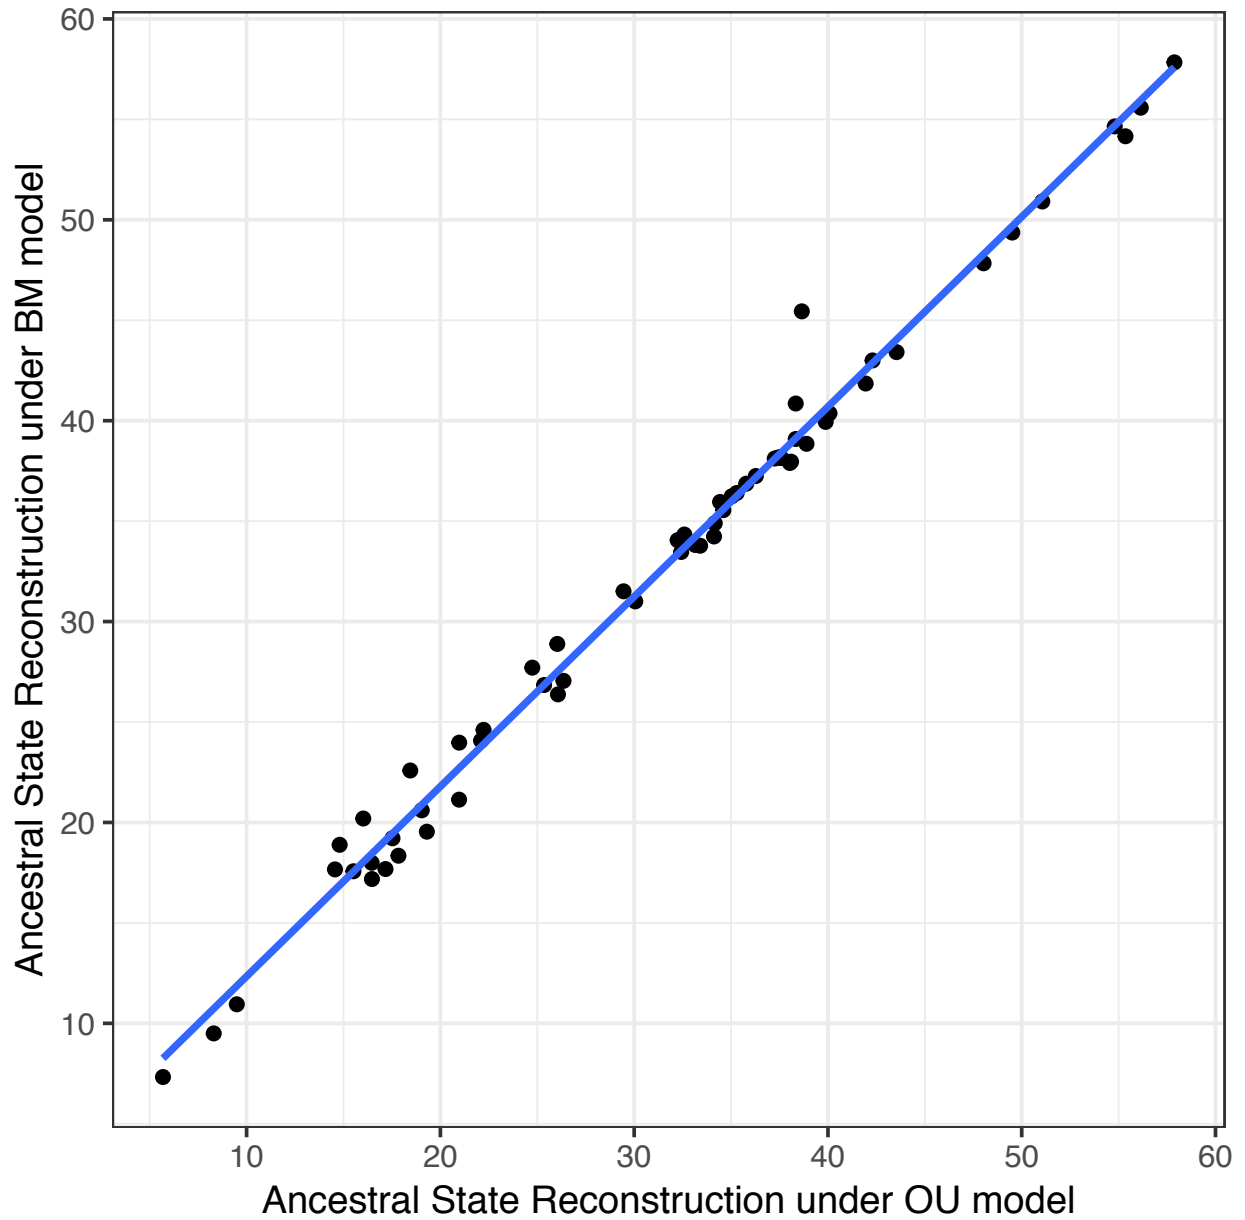

**Figure S1.** Comparing ancestral state reconstructions when assuming an Ornstein-Uhlenbeck (OU) model of trait evolution to a Brownian Motion (BM) model of trait evolution for the all data combined dataset. The OU estimates slightly quicker rates of autotomy (based on square root transformed mean latency to autotomize in seconds) at ancestral nodes.

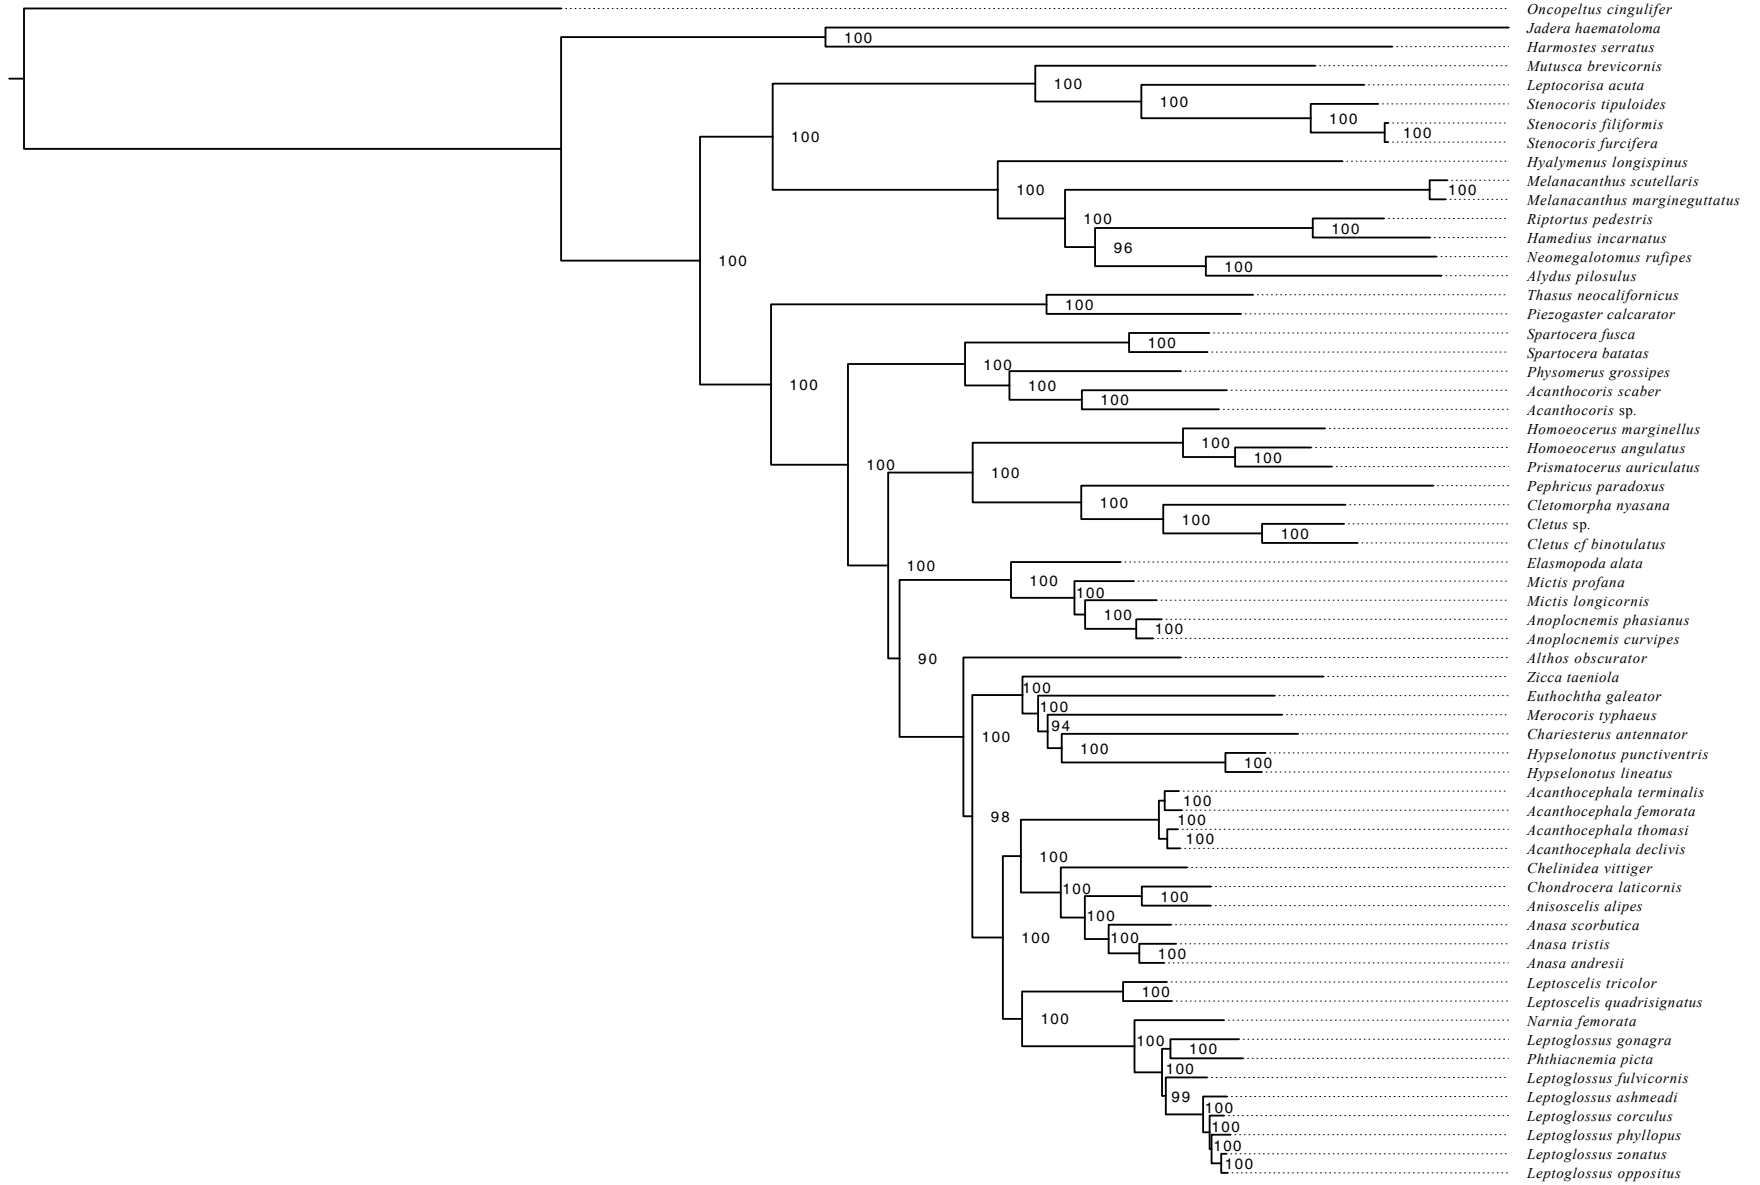

**Figure S2.** RAxML best tree with bootstrap values labeled at the nodes.

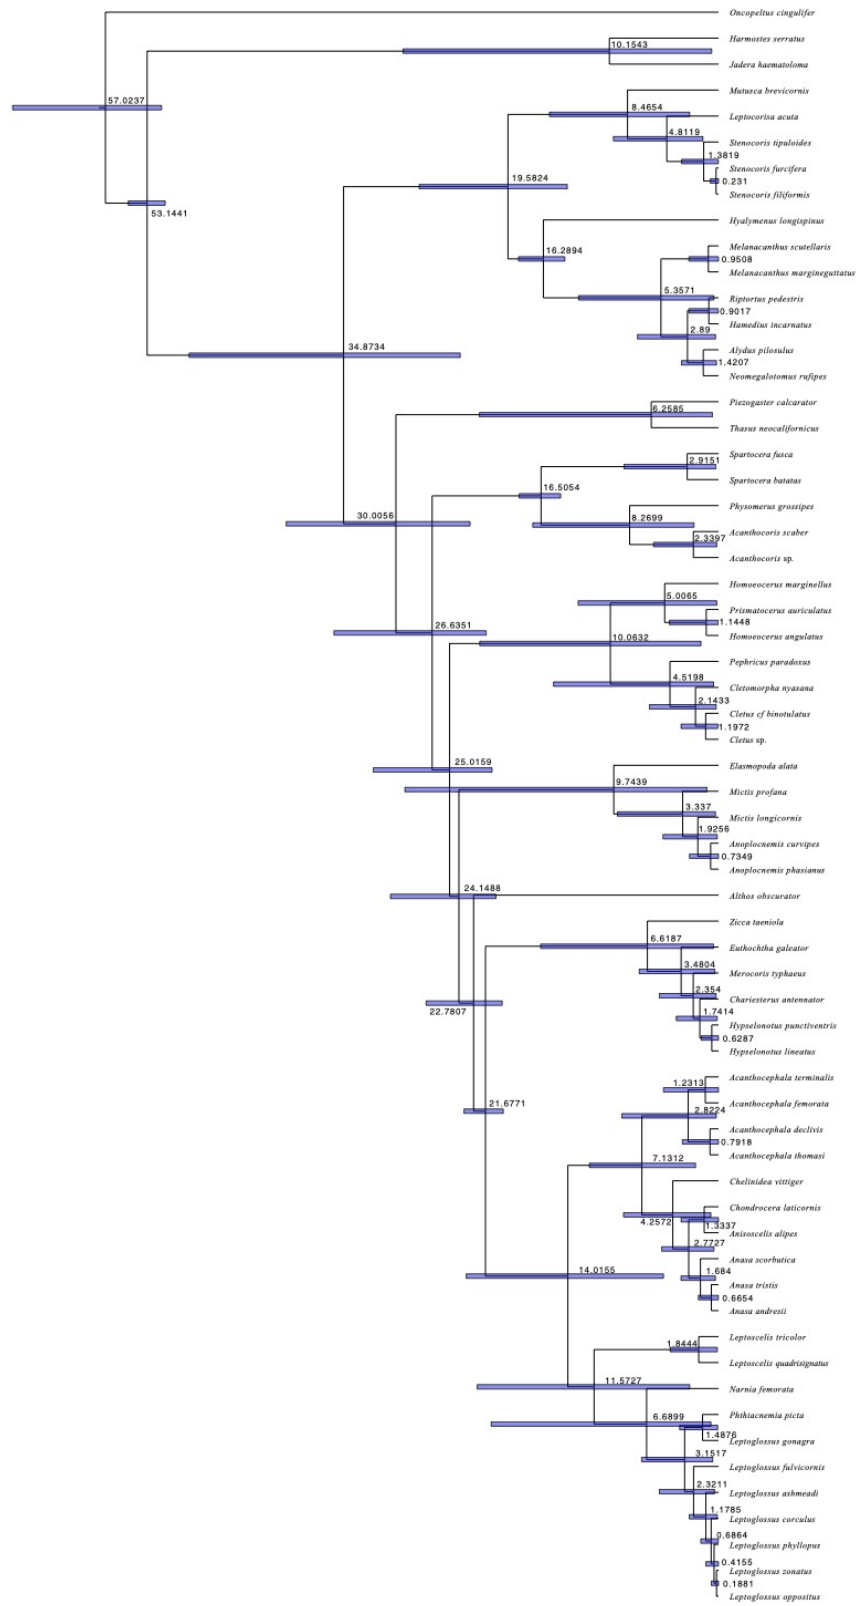

**Figure S3.** Dated BEAST tree with median node ages labeled and bars denoting the 95% highest probability density interval.



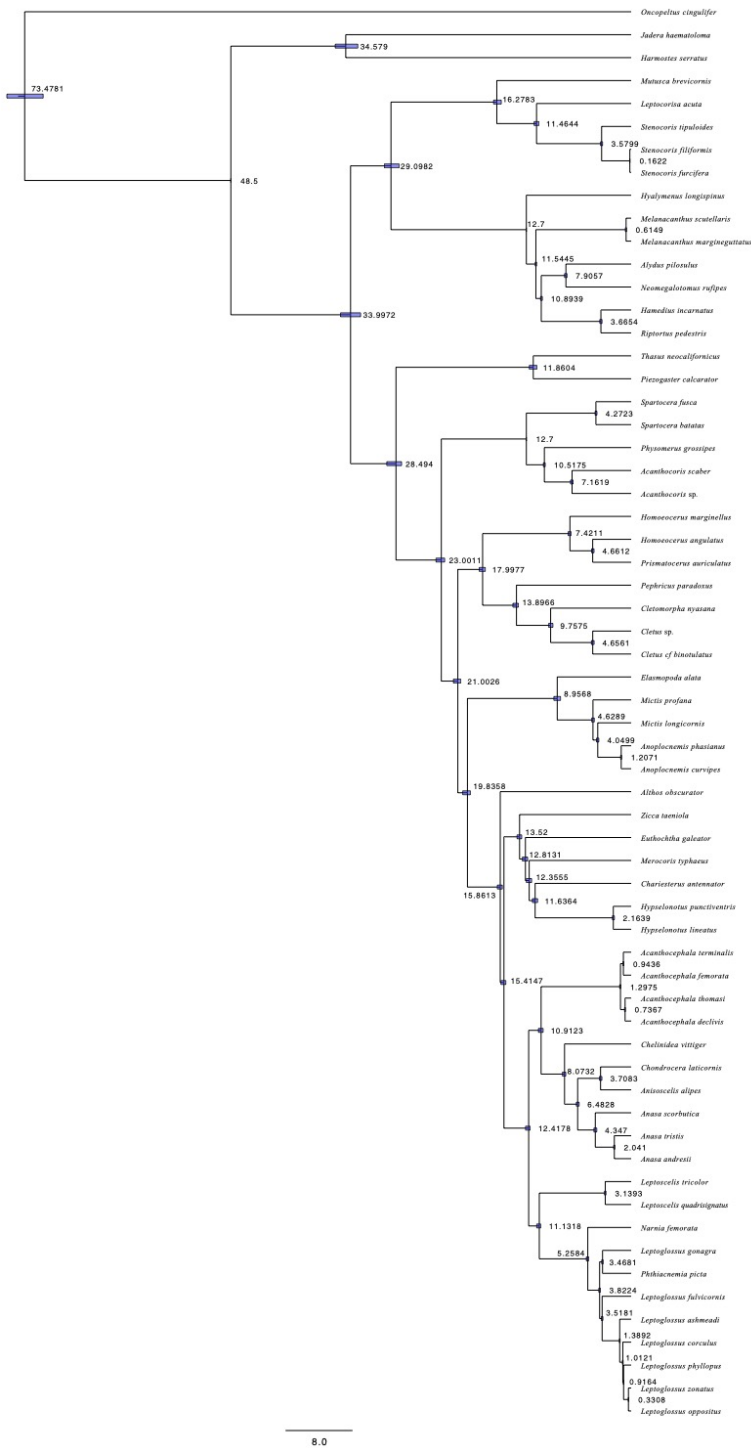

**Figure S4.** Dated TreePL tree with median node ages labeled and error bars that show the range of age estimates across 100 bootstrap trees. An absent error bar at a node means that all 100 bootstrap trees converged on the same age for that node.

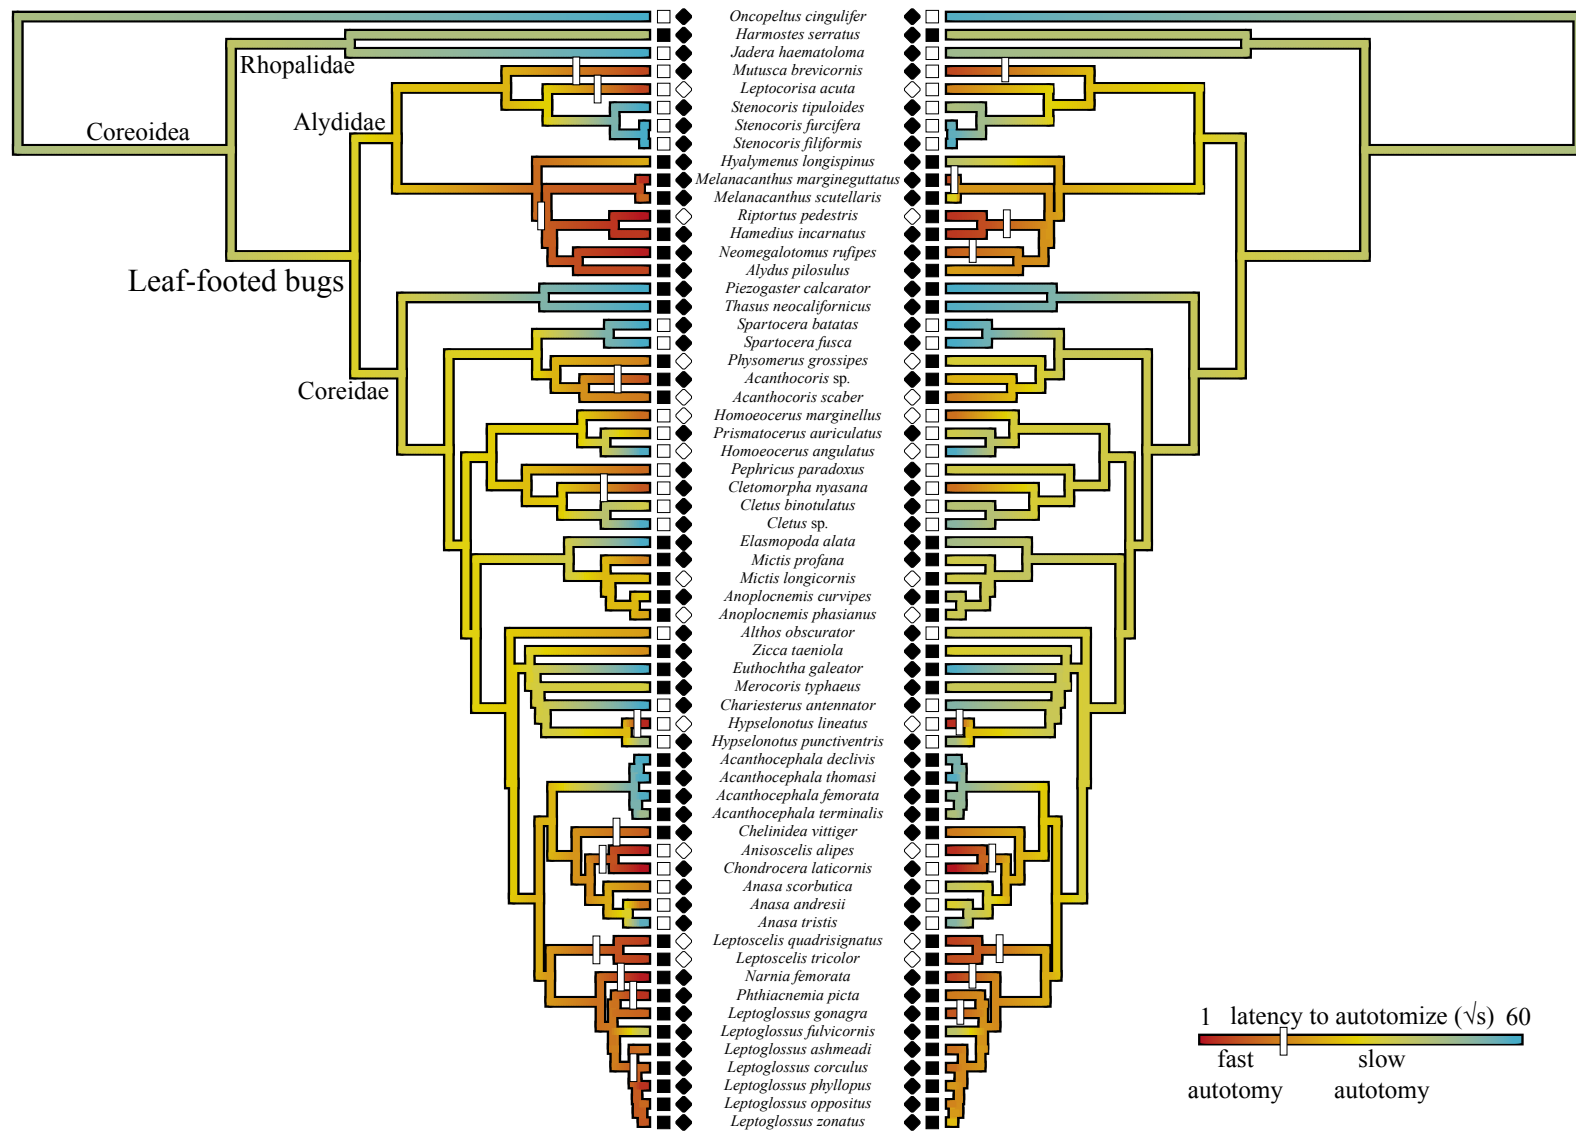

**Figure S5.** Ancestral state reconstruction for the median (left) and mean (right) latency to autotomize (i.e., Figure 1) with tip labels.

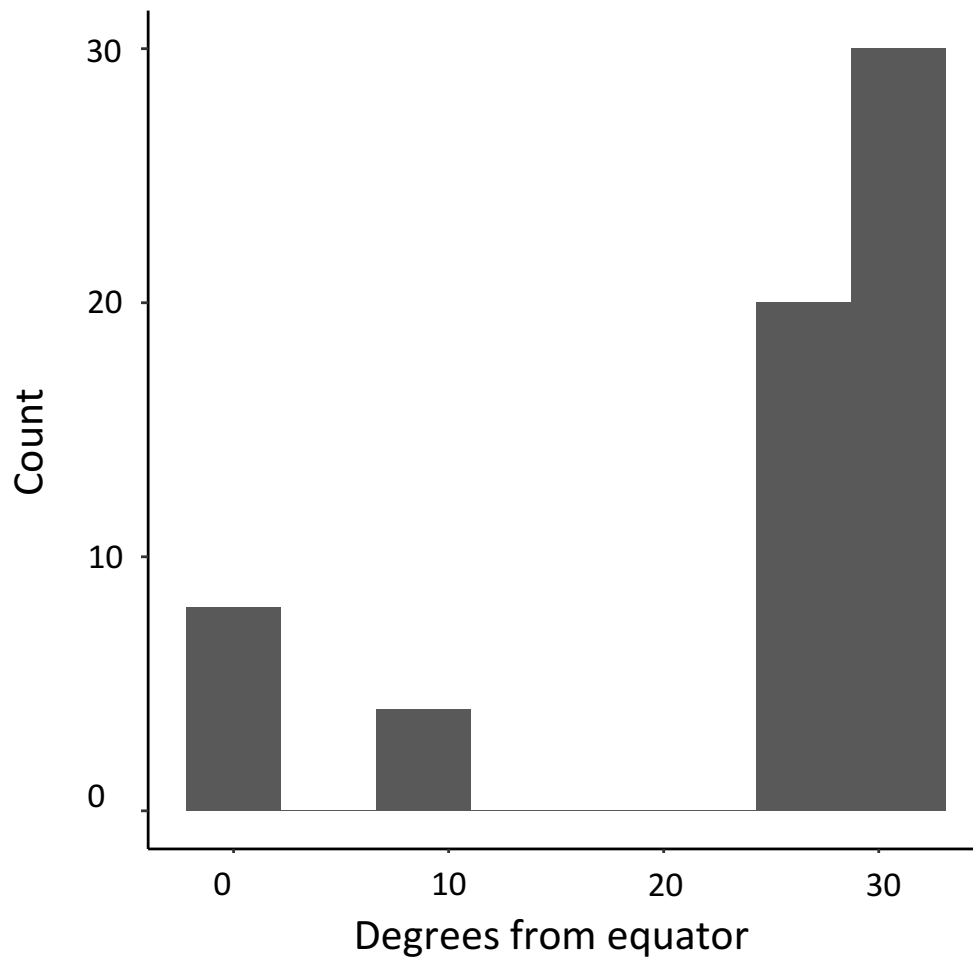

**Figure S6.** Degrees from equator, our latitudinal gradient, had a bimodal distribution. Therefore, we categorized species that were collected within 10 degrees of the equator as species close to the equator and those farther than 25 degrees away from the equator as species far from the equator. This categorization was *only* used to help visualize the potential interaction between body size and degrees from the equator in Figure 1 and 2, and not used in statistical analyses.

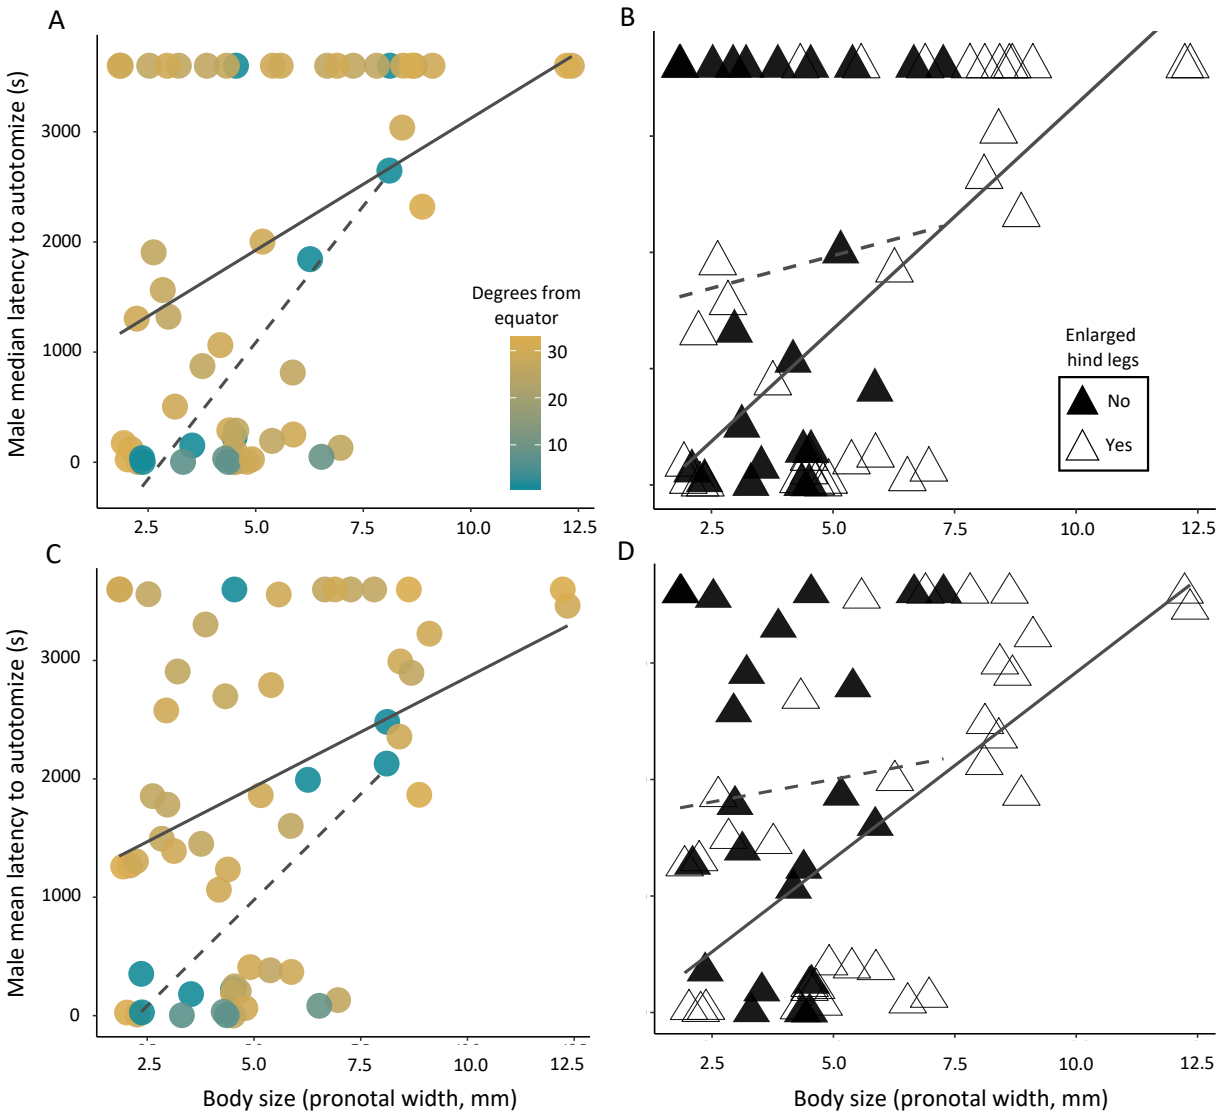

**Figure S7.** Small males with enlarged hind legs found near the equator autotomize quickly. Here, we visualize the male autotomy data while removing a single data point (*Pephricus paradoxus*, which has a median latency to autotomize of 114 s [A and B] and mean of 97 s [C and D], a body size of 10.3 mm, was collected 26.3 degrees away from equator, and does not have enlarged hind legs). Notice that the interactions are not as distinct after removing our *P. paradoxus* data point when compared to Figure 2I-L. Circle coloration corresponds to distance from the equator, in degrees, from which species were collected (A and C). Open triangles and the corresponding solid lined regressions denote presence of enlarged hind legs, while closed triangles and dashed lined regressions correspond to the absence of enlarged hind legs (B and D). Untransformed autotomy data was used in this figure to aid data interpretation.

| Family    | Subfamily     | Tribe            | Genus                 | Species                | Paired Reads | Reads passed QC | Contigs | Total bp | Mean contig length | Min contig length | Max contig length | UCE loci | % UCE recovered | Mean UCE length | Min UCE length | Max UCE length |
|-----------|---------------|------------------|-----------------------|------------------------|--------------|-----------------|---------|----------|--------------------|-------------------|-------------------|----------|-----------------|-----------------|----------------|----------------|
| Alydidae  | Alydinae      |                  | <i>Alyda</i>          | <i>pilosulus</i>       | 7444142      | 4599199         | 20362   | 9519217  | 467.50             | 181               | 5593              | 1278     | 47.81           | 760.2042254     | 202            | 3380           |
| Alydidae  | Alydinae      |                  | <i>Melanacanthus</i>  | <i>margineguttatus</i> | 8421192      | 4104664         | 9967    | 5309317  | 532.69             | 188               | 4191              | 778      | 29.11           | 729.8020566     | 201            | 3089           |
| Alydidae  | Alydinae      |                  | <i>Melanacanthus</i>  | <i>scutellaris</i>     | 5436566      | 2544625         | 6848    | 3388540  | 494.82             | 193               | 3329              | 780      | 29.18           | 605.2230769     | 201            | 2646           |
| Alydidae  | Alydinae      |                  | <i>Riptortus</i>      | <i>pedestris</i>       | 4581022      | 2956378         | 16876   | 8440804  | 500.17             | 194               | 12071             | 1252     | 46.84           | 425.4464856     | 201            | 2775           |
| Alydidae  | Micrelytrinae | Leptocorisini    | <i>Leptocoris</i>     | <i>acuta</i>           | 8562652      | 4386954         | 20715   | 8378223  | 404.45             | 197               | 2996              | 1339     | 50.09           | 652.8170276     | 201            | 2548           |
| Alydidae  | Micrelytrinae | Leptocorisini    | <i>Stenocoris</i>     | <i>filiformis</i>      | 4779514      | 2787529         | 15624   | 6718365  | 430.00             | 200               | 5275              | 1463     | 54.73           | 633.7382092     | 201            | 2701           |
| Alydidae  | Micrelytrinae | Leptocorisini    | <i>Stenocoris</i>     | <i>furcifera</i>       | 13734054     | 4350648         | 17991   | 6563582  | 364.83             | 201               | 2845              | 1499     | 56.08           | 566.8925951     | 202            | 2543           |
| Coreidae  | Coreinae      | Acanthocephalini | <i>Acanthocephala</i> | <i>delcivis</i>        | 5535530      | 2273749         | 6117    | 3047522  | 498.21             | 188               | 2835              | 920      | 34.42           | 695.7086957     | 201            | 2835           |
| Coreidae  | Coreinae      | Acanthocephalini | <i>Acanthocephala</i> | <i>terminalis</i>      | 7401210      | 3257152         | 7158    | 3630523  | 507.20             | 201               | 3296              | 954      | 35.69           | 726.0178197     | 201            | 2983           |
| Coreidae  | Coreinae      | Acanthocorini    | <i>Acanthocoris</i>   | <i>scaber</i>          | 4065822      | 1651257         | 7141    | 3154704  | 441.77             | 201               | 2620              | 947      | 35.43           | 561.5142555     | 201            | 2620           |
| Coreidae  | Coreinae      | Acanthocorini    | <i>Acanthocoris</i>   | sp.                    | 6599656      | 3025631         | 21830   | 9700951  | 444.39             | 191               | 5171              | 1388     | 51.93           | 728.3436599     | 201            | 2955           |
| Coreidae  | Coreinae      | Acanthocorini    | <i>Physomerus</i>     | <i>grossipes</i>       | 4025938      | 2173257         | 8080    | 3468458  | 429.26             | 183               | 4375              | 719      | 26.90           | 681.5577191     | 201            | 4375           |
| Coreidae  | Coreinae      | Anisoscelini     | <i>Leptoglossus</i>   | <i>ashmeadi</i>        | 5926698      | 3085191         | 8061    | 3685247  | 457.17             | 190               | 3505              | 825      | 30.86           | 698.2715152     | 202            | 2810           |
| Coreidae  | Coreinae      | Anisoscelini     | <i>Leptoglossus</i>   | <i>corculus</i>        | 4279664      | 2569863         | 16452   | 7005204  | 425.80             | 185               | 3625              | 1261     | 47.18           | 681.0150674     | 201            | 3279           |
| Coreidae  | Coreinae      | Anisoscelini     | <i>Leptoglossus</i>   | <i>fulvicornis</i>     | 4425804      | 2221638         | 12537   | 4661345  | 371.81             | 191               | 3041              | 1205     | 45.08           | 425.2207469     | 201            | 2328           |
| Coreidae  | Coreinae      | Anisoscelini     | <i>Leptoglossus</i>   | <i>oppositus</i>       | 5816802      | 2719254         | 8089    | 3522975  | 435.53             | 199               | 2847              | 811      | 30.34           | 609.0567201     | 201            | 2847           |
| Coreidae  | Coreinae      | Anisoscelini     | <i>Leptoglossus</i>   | <i>zonatus</i>         | 6491074      | 3334668         | 11091   | 5559863  | 501.30             | 184               | 4236              | 969      | 36.25           | 829.120743      | 201            | 3255           |
| Coreidae  | Coreinae      | Anisoscelini     | <i>Leptoscelis</i>    | <i>quadrisingnatus</i> | 8373644      | 3481066         | 8542    | 4150358  | 485.88             | 201               | 3420              | 937      | 35.05           | 773.0448239     | 201            | 3420           |
| Coreidae  | Coreinae      | Gonocerini       | <i>Cletomorpha</i>    | <i>nyasana</i>         | 2872812      | 1870543         | 12839   | 5384418  | 419.38             | 185               | 3201              | 1012     | 37.86           | 528.2420949     | 201            | 2680           |
| Coreidae  | Coreinae      | Gonocerini       | <i>Cletus</i>         | <i>binotulatus</i>     | 7923198      | 4837846         | 31863   | 13816082 | 433.61             | 179               | 6361              | 1238     | 46.32           | 700.5161551     | 201            | 2914           |
| Coreidae  | Coreinae      | Gonocerini       | <i>Cletus</i>         | sp.                    | 6334316      | 3672259         | 24664   | 10477547 | 424.81             | 187               | 3685              | 1358     | 50.80           | 672.6634757     | 201            | 2763           |
| Coreidae  | Coreinae      | Homoeocerini     | <i>Homoeocerus</i>    | <i>angulatus</i>       | 4534196      | 2665879         | 15888   | 7377455  | 464.34             | 184               | 3888              | 1325     | 49.57           | 737.749434      | 202            | 3069           |
| Coreidae  | Coreinae      | Homoeocerini     | <i>Homoeocerus</i>    | <i>marginellus</i>     | 7809332      | 3508693         | 9155    | 4848962  | 529.65             | 177               | 4789              | 1010     | 37.79           | 898.8217822     | 202            | 3853           |
| Coreidae  | Coreinae      | Homoeocerini     | <i>Prismatocerus</i>  | <i>auriculatus</i>     | 5330848      | 2826069         | 16421   | 7438508  | 452.99             | 180               | 3630              | 1267     | 47.40           | 693.8145225     | 201            | 3114           |
| Coreidae  | Coreinae      | Hypselonotini    | <i>Anasa</i>          | <i>andresii</i>        | 3134698      | 1627650         | 6367    | 3163545  | 496.87             | 194               | 3110              | 814      | 30.45           | 743.002457      | 201            | 3056           |
| Coreidae  | Coreinae      | Hypselonotini    | <i>Anasa</i>          | <i>scorbatica</i>      | 8552484      | 3240607         | 9145    | 4354582  | 476.17             | 194               | 4210              | 902      | 33.74           | 752.304878      | 201            | 4210           |
| Coreidae  | Coreinae      | Hypselonotini    | <i>Hypselonotus</i>   | <i>lineatus</i>        | 5723868      | 2286214         | 4409    | 1990205  | 451.40             | 191               | 5170              | 561      | 20.99           | 528.2869875     | 201            | 2892           |
| Coreidae  | Coreinae      | Hypselonotini    | <i>Hypselonotus</i>   | <i>punctiventris</i>   | 2173082      | 1223039         | 9150    | 4291551  | 469.02             | 201               | 4267              | 1063     | 39.77           | 608.8024459     | 203            | 2660           |
| Coreidae  | Coreinae      | Mictini          | <i>Anoplocnemis</i>   | <i>curvipes</i>        | 8379830      | 3695282         | 10417   | 5077522  | 487.43             | 189               | 5769              | 880      | 32.92           | 801.7534091     | 201            | 2938           |
| Coreidae  | Coreinae      | Mictini          | <i>Anoplocnemis</i>   | <i>phasianus</i>       | 16602494     | 8207329         | 37865   | 15132165 | 399.63             | 183               | 4017              | 1441     | 53.91           | 739.1075642     | 201            | 2978           |
| Coreidae  | Coreinae      | Mictini          | <i>Mictis</i>         | <i>longicornis</i>     | 1646384      | 995761          | 6507    | 2411749  | 370.64             | 192               | 2774              | 1288     | 48.19           | 438.996118      | 201            | 2774           |
| Coreidae  | Coreinae      | Mictini          | <i>Mictis</i>         | <i>profana</i>         | 8903460      | 3767996         | 9157    | 4613789  | 503.85             | 183               | 4162              | 1000     | 37.41           | 765.077         | 203            | 3191           |
| Coreidae  | Coreinae      | Phyllomorphiini  | <i>Pephricus</i>      | <i>paradoxus</i>       | 11113622     | 7678651         | 37585   | 15828252 | 421.13             | 199               | 3592              | 1379     | 51.59           | 769.5358956     | 202            | 3081           |
| Coreidae  | Coreinae      | Spartocerini     | <i>Spartocera</i>     | <i>batatas</i>         | 6613952      | 2946003         | 9815    | 5034034  | 512.89             | 188               | 5472              | 932      | 34.87           | 915.3927039     | 202            | 5472           |
| Lygaeidae | Lygaeinae     |                  | <i>Oncopeltus</i>     | <i>cingulifer</i>      | 19949254     | 6615116         | 19336   | 8224437  | 425.34             | 189               | 2710              | 1041     | 38.95           | 847.4082613     | 204            | 2226           |

**Table S1.** Summary data for sequence reads, contigs, and ultraconserved element loci generated in this study.

|              | Estimated Coefficient | Standard Error | t        | p        |
|--------------|-----------------------|----------------|----------|----------|
| Intercept    | 8.5790702             | 8.81583        | 0.973144 | 0.334742 |
| Latitude     | 0.5033034             | 0.2550053      | 1.973698 | 0.053448 |
| Body Size    | 3.3586916             | 1.143077       | 2.93829  | 0.004815 |
| Enlarged Leg | -23.1199948           | 6.5951357      | -3.50561 | 0.000915 |

**Table S2.** Best model for the median female data.

|              | Estimated Coefficient | Standard Error | t        | p        |
|--------------|-----------------------|----------------|----------|----------|
| Intercept    | 7.24364               | 7.54845        | 0.95962  | 0.341447 |
| Latitude     | 0.63452               | 0.22876        | 2.77373  | 0.007553 |
| Body Size    | 2.94169               | 0.94109        | 3.12584  | 0.002831 |
| Enlarged Leg | -16.80564             | 5.12578        | -3.27865 | 0.001812 |

**Table S3.** Best model for the mean female data.

|           | Estimated Coefficient | Standard Error | t        | p        |
|-----------|-----------------------|----------------|----------|----------|
| Intercept | 10.776588             | 8.73097        | 1.234295 | 0.222438 |
| Latitude  | 0.452489              | 0.257162       | 1.759548 | 0.084149 |
| Body Size | 2.87045               | 1.230257       | 2.333212 | 0.023391 |

**Table S4.** Best models for the median male data

|                        | Estimated Coefficient | Standard Error | t         | p        |
|------------------------|-----------------------|----------------|-----------|----------|
| Intercept              | 10.143178             | 15.851696      | 0.63988   | 0.525115 |
| Latitude               | 1.483707              | 0.553177       | 2.682154  | 0.009833 |
| Body Size              | 2.698446              | 3.145863       | 0.857776  | 0.395029 |
| Enlarged Leg           | -31.93852             | 12.66494       | -2.521806 | 0.014841 |
| Latitude:Body Size     | -0.175682             | 0.097263       | -1.80626  | 0.07678  |
| Enlarged Leg:Body Size | 5.551336              | 2.429915       | 2.28458   | 0.026531 |

**Table S5.** Best model for the mean male data.

|                    | Estimated Coefficient | Standard Error | t         | p        |
|--------------------|-----------------------|----------------|-----------|----------|
| Intercept          | -6.470711             | 14.53343       | -0.445229 | 0.658038 |
| Latitude           | 1.37477               | 0.536069       | 2.564539  | 0.013318 |
| Body Size          | 7.520353              | 2.763235       | 2.721576  | 0.008867 |
| Enlarged Leg       | -10.397952            | 5.961791       | -1.744099 | 0.087167 |
| Latitude:Body Size | -0.16018              | 0.094221       | -1.700055 | 0.095212 |

**Table S6.** Best model for the mean male data, minus *Pephricus paradoxus*.

|                    | Estimated Coefficient | Standard Error | t         | p        |
|--------------------|-----------------------|----------------|-----------|----------|
| Intercept          | -14.0899983           | 16.3481031     | -0.861874 | 0.392792 |
| Latitude           | 1.4204894             | 0.6012626      | 2.3625109 | 0.022005 |
| Body Size          | 9.1506415             | 3.0987825      | 2.9529796 | 0.004749 |
| Enlarged Leg       | -10.370064            | 6.8008545      | -1.524818 | 0.133482 |
| Latitude:Body Size | -0.1838082            | 0.1052683      | -1.746093 | 0.086816 |

**Table S7.** Best model for the median male data, minus *Pephricus paradoxus*.

## LITERATURE CITED

- Johnson, K. P., C. H. Dietrich, F. Friedrich, R. G. Beutel, B. Wipfler, R. S. Peters, J. M. Allen, M. Petersen, A. Donath, K. K. O. Walden, A. M. Kozlov, L. Podsiadlowski, C. Mayer, K. Meusemann, A. Vasilikopoulos, R. M. Waterhouse, S. L. Cameron, C. Weirauch, D. R. Swanson, D. M. Percy, and K. Yoshizawa. 2018. Phylogenomics and the evolution of hemipteroid insects. *Proc. Natl. Acad. Sci.* 115:12775–12780.
- Liu, Y., H. Li, F. Song, Y. Zhao, J. Wilson, and W. Cai. 2019. Higher-level phylogeny and evolutionary history of Pentatomomorpha (Hemiptera: Heteroptera) inferred from mitochondrial genome sequences. *Syst. Entomol.*
- Li, H., J. M. Leavengood, E. G. Chapman, D. Burkhardt, F. Song, P. Jiang, J. Liu, X. Zhou, and W. Cai. 2017. Mitochondrial phylogenomics of Hemiptera reveals adaptive innovations driving the diversification of true bugs. *Proc. Biol. Sci.* 284.
- Wang, Y., Y. Cui, D. Rédei, P. Baňář, Q. Xie, P. Štys, J. Damgaard, P. Chen, W. Yi, Y. Wang, K. Dang, C. Li, and W. Bu. 2016. Phylogenetic divergences of the true bugs (Insecta: Hemiptera: Heteroptera), with emphasis on the aquatic lineages: the last piece of the aquatic insect jigsaw originated in the Late Permian/Early Triassic. *Cladistics* 32:390–405.
